# Supplementary material for: Vestigial auriculomotor activity indicates the direction of auditory attention in humans
Source: eLife journal article supplement (doi:10.7554/elife.54536), 2020-07-03
Supplement: supp1 [file elife-54536-supp1-v1.pdf]

## Supplementary File 1

1 The following tables summarize the statistical results when using gaze shifts and the  
 2 neck muscle activity additionally for the artifact rejection in the individual muscle  
 3 electromyograms. The results demonstrate that the inclusion of this information has  
 4 no major impact, strengthening the conclusions made from Figure 8.

| Full Signal                              |         |        |       |                     |                                                     |         |        |       |                     |
|------------------------------------------|---------|--------|-------|---------------------|-----------------------------------------------------|---------|--------|-------|---------------------|
| Artifact rejection based on channel only |         |        |       |                     | Artifact rejection based on channel, M.SCM and HEOG |         |        |       |                     |
| Source                                   | Measure | F      | Sig.  | Partial Eta Squared | Source                                              | Measure | F      | Sig.  | Partial Eta Squared |
| ipsiCont                                 | PAM     | 14.792 | 0.001 | 0.438               | ipsiCont                                            | PAM     | 14.748 | 0.001 | 0.437               |
|                                          | AAM     | 4.717  | 0.043 | 0.199               |                                                     | AAM     | 5.359  | 0.032 | 0.220               |
|                                          | TAM     | 0.072  | 0.791 | 0.004               |                                                     | TAM     | 0.058  | 0.813 | 0.003               |
|                                          | SAM     | 19.626 | 0.000 | 0.508               |                                                     | SAM     | 20.306 | 0.000 | 0.517               |
| ipsiCont * ageGroup                      | PAM     | 0.049  | 0.828 | 0.003               | ipsiCont * ageGroup                                 | PAM     | 0.058  | 0.812 | 0.003               |
|                                          | AAM     | 0.002  | 0.961 | 0.000               |                                                     | AAM     | 0.008  | 0.928 | 0.000               |
|                                          | TAM     | 0.018  | 0.896 | 0.001               |                                                     | TAM     | 0.023  | 0.880 | 0.001               |
|                                          | SAM     | 1.172  | 0.292 | 0.058               |                                                     | SAM     | 1.530  | 0.231 | 0.075               |
| anteriority                              | PAM     | 5.760  | 0.027 | 0.233               | anteriority                                         | PAM     | 5.811  | 0.026 | 0.234               |
|                                          | AAM     | 3.167  | 0.091 | 0.143               |                                                     | AAM     | 2.882  | 0.106 | 0.132               |
|                                          | TAM     | 8.137  | 0.010 | 0.300               |                                                     | TAM     | 7.635  | 0.012 | 0.287               |
|                                          | SAM     | 12.094 | 0.003 | 0.389               |                                                     | SAM     | 11.574 | 0.003 | 0.379               |
| anteriority * ageGroup                   | PAM     | 0.284  | 0.600 | 0.015               | anteriority * ageGroup                              | PAM     | 0.348  | 0.562 | 0.018               |
|                                          | AAM     | 0.010  | 0.923 | 0.001               |                                                     | AAM     | 0.039  | 0.846 | 0.002               |
|                                          | TAM     | 1.353  | 0.259 | 0.066               |                                                     | TAM     | 1.158  | 0.295 | 0.057               |
| ipsiCont * anteriority                   | PAM     | 3.507  | 0.077 | 0.156               | ipsiCont * anteriority                              | PAM     | 3.730  | 0.069 | 0.164               |
|                                          | AAM     | 2.187  | 0.156 | 0.103               |                                                     | AAM     | 2.961  | 0.102 | 0.135               |
|                                          | TAM     | 0.492  | 0.492 | 0.025               |                                                     | TAM     | 0.529  | 0.476 | 0.027               |
|                                          | SAM     | 0.099  | 0.757 | 0.005               |                                                     | SAM     | 0.225  | 0.641 | 0.012               |
| ipsiCont * anteriority * ageGroup        | PAM     | 0.173  | 0.682 | 0.009               | ipsiCont * anteriority * ageGroup                   | PAM     | 0.193  | 0.666 | 0.010               |
|                                          | AAM     | 0.001  | 0.981 | 0.000               |                                                     | AAM     | 0.036  | 0.852 | 0.002               |
|                                          | TAM     | 0.314  | 0.582 | 0.016               |                                                     | TAM     | 0.282  | 0.601 | 0.015               |
|                                          | SAM     | 0.047  | 0.831 | 0.002               |                                                     | SAM     | 0.151  | 0.701 | 0.008               |

Table 1: Experiment 2 - table supplement 1: Results of the repeated measures ANOVA with three within-subjects factors for all four auricular muscles. ipsiCont: ipsilateral vs. contralateral channel (with respect to the attended side). ageGroup: older vs. younger adults. anteriority: stimulus presentation from the front or back speakers. The left columns show the results when only the corresponding channel was used to reject artifacts, while the right columns display the results when artifact rejection additionally considers the M.SCM and HEOG.

| Subbands PAM                             |         |        |       |                     |                                                     |         |        |       |                     |
|------------------------------------------|---------|--------|-------|---------------------|-----------------------------------------------------|---------|--------|-------|---------------------|
| Artifact rejection based on channel only |         |        |       |                     | Artifact rejection based on channel, M.SCM and HEOG |         |        |       |                     |
| Source                                   | Measure | F      | Sig.  | Partial Eta Squared | Source                                              | Measure | F      | Sig.  | Partial Eta Squared |
| ipsiCont                                 | f1      | 8.492  | 0.009 | 0.309               | ipsiCont                                            | f1      | 8.282  | 0.010 | 0.304               |
|                                          | f2      | 10.668 | 0.004 | 0.360               |                                                     | f2      | 10.735 | 0.004 | 0.361               |
|                                          | f3      | 12.544 | 0.002 | 0.398               |                                                     | f3      | 12.282 | 0.002 | 0.393               |
|                                          | f4      | 14.650 | 0.001 | 0.435               |                                                     | f4      | 14.413 | 0.001 | 0.431               |
|                                          | f5      | 17.185 | 0.001 | 0.475               |                                                     | f5      | 17.086 | 0.001 | 0.473               |
|                                          | f6      | 16.865 | 0.001 | 0.470               |                                                     | f6      | 17.133 | 0.001 | 0.474               |
|                                          | f7      | 17.671 | 0.000 | 0.482               |                                                     | f7      | 18.116 | 0.000 | 0.488               |
|                                          | f8      | 10.320 | 0.005 | 0.352               |                                                     | f8      | 10.432 | 0.004 | 0.354               |
| ipsiCont * ageGroup                      | f1      | 0.125  | 0.728 | 0.007               | ipsiCont * ageGroup                                 | f1      | 0.158  | 0.695 | 0.008               |
|                                          | f2      | 0.368  | 0.551 | 0.019               |                                                     | f2      | 0.418  | 0.525 | 0.022               |
|                                          | f3      | 0.077  | 0.785 | 0.004               |                                                     | f3      | 0.107  | 0.747 | 0.006               |
|                                          | f4      | 0.003  | 0.959 | 0.000               |                                                     | f4      | 0.001  | 0.982 | 0.000               |
|                                          | f5      | 0.000  | 0.985 | 0.000               |                                                     | f5      | 0.000  | 0.992 | 0.000               |
|                                          | f6      | 0.013  | 0.911 | 0.001               |                                                     | f6      | 0.013  | 0.909 | 0.001               |
|                                          | f7      | 0.004  | 0.950 | 0.000               |                                                     | f7      | 0.007  | 0.936 | 0.000               |
|                                          | f8      | 0.000  | 0.985 | 0.000               |                                                     | f8      | 0.003  | 0.958 | 0.000               |
| anteriority                              | f1      | 2.409  | 0.137 | 0.113               | anteriority                                         | f1      | 2.430  | 0.136 | 0.113               |
|                                          | f2      | 4.083  | 0.058 | 0.177               |                                                     | f2      | 4.059  | 0.058 | 0.176               |
|                                          | f3      | 6.217  | 0.022 | 0.247               |                                                     | f3      | 6.269  | 0.022 | 0.248               |
|                                          | f4      | 6.403  | 0.020 | 0.252               |                                                     | f4      | 6.521  | 0.019 | 0.256               |
|                                          | f5      | 6.260  | 0.022 | 0.248               |                                                     | f5      | 6.362  | 0.021 | 0.251               |
|                                          | f6      | 5.275  | 0.033 | 0.217               |                                                     | f6      | 5.289  | 0.033 | 0.218               |
|                                          | f7      | 4.308  | 0.052 | 0.185               |                                                     | f7      | 4.349  | 0.051 | 0.186               |
|                                          | f8      | 11.086 | 0.004 | 0.368               |                                                     | f8      | 11.072 | 0.004 | 0.368               |
| anteriority * ageGroup                   | f1      | 1.983  | 0.175 | 0.095               | anteriority * ageGroup                              | f1      | 2.097  | 0.164 | 0.099               |
|                                          | f2      | 1.137  | 0.300 | 0.056               |                                                     | f2      | 1.350  | 0.260 | 0.066               |
|                                          | f3      | 0.109  | 0.745 | 0.006               |                                                     | f3      | 0.144  | 0.709 | 0.008               |
|                                          | f4      | 0.056  | 0.816 | 0.003               |                                                     | f4      | 0.069  | 0.796 | 0.004               |
|                                          | f5      | 0.176  | 0.679 | 0.009               |                                                     | f5      | 0.189  | 0.669 | 0.010               |
|                                          | f6      | 0.680  | 0.420 | 0.035               |                                                     | f6      | 0.724  | 0.405 | 0.037               |
|                                          | f7      | 0.950  | 0.342 | 0.048               |                                                     | f7      | 0.994  | 0.331 | 0.050               |
|                                          | f8      | 0.685  | 0.418 | 0.035               |                                                     | f8      | 0.673  | 0.422 | 0.034               |
| ipsiCont * anteriority                   | f1      | 0.345  | 0.564 | 0.018               | ipsiCont * anteriority                              | f1      | 0.469  | 0.502 | 0.024               |
|                                          | f2      | 3.362  | 0.082 | 0.150               |                                                     | f2      | 3.932  | 0.062 | 0.171               |
|                                          | f3      | 6.342  | 0.021 | 0.250               |                                                     | f3      | 6.733  | 0.018 | 0.262               |
|                                          | f4      | 4.485  | 0.048 | 0.191               |                                                     | f4      | 4.344  | 0.051 | 0.186               |
|                                          | f5      | 3.130  | 0.093 | 0.141               |                                                     | f5      | 3.088  | 0.095 | 0.140               |
|                                          | f6      | 2.720  | 0.116 | 0.125               |                                                     | f6      | 2.779  | 0.112 | 0.128               |
|                                          | f7      | 1.988  | 0.175 | 0.095               |                                                     | f7      | 1.949  | 0.179 | 0.093               |
|                                          | f8      | 0.077  | 0.785 | 0.004               |                                                     | f8      | 0.070  | 0.794 | 0.004               |
| ipsiCont * anteriority * ageGroup        | f1      | 0.340  | 0.567 | 0.018               | ipsiCont * anteriority * ageGroup                   | f1      | 0.380  | 0.545 | 0.020               |
|                                          | f2      | 1.025  | 0.324 | 0.051               |                                                     | f2      | 1.070  | 0.314 | 0.053               |
|                                          | f3      | 0.325  | 0.575 | 0.017               |                                                     | f3      | 0.342  | 0.565 | 0.018               |
|                                          | f4      | 0.174  | 0.681 | 0.009               |                                                     | f4      | 0.164  | 0.690 | 0.009               |
|                                          | f5      | 1.117  | 0.304 | 0.056               |                                                     | f5      | 1.126  | 0.302 | 0.056               |
|                                          | f6      | 1.543  | 0.229 | 0.075               |                                                     | f6      | 1.608  | 0.220 | 0.078               |
|                                          | f7      | 2.691  | 0.117 | 0.124               |                                                     | f7      | 2.702  | 0.117 | 0.125               |
|                                          | f8      | 0.902  | 0.354 | 0.045               |                                                     | f8      | 0.907  | 0.353 | 0.046               |

Table 2: Experiment 2 - table supplement 2: Results of the repeated measures ANOVA with three within-subjects factors for the frequency decomposed PAM. f1 to f8 refer to the subbands in descending order of frequency. ipsiCont: ipsilateral vs. contralateral channel (with respect to the attended side). ageGroup: older vs. younger adults. anteriority: stimulus presentation from the front or back speakers. The left columns show the results when only the corresponding channel was used to reject artifacts, while the right columns display the results when artifact rejection additionally considers the M.SCM and HEOG.

| Subbands AAM                             |         |        |       |                     |                                                     |         |        |       |                     |
|------------------------------------------|---------|--------|-------|---------------------|-----------------------------------------------------|---------|--------|-------|---------------------|
| Artifact rejection based on channel only |         |        |       |                     | Artifact rejection based on channel, M.SCM and HEOG |         |        |       |                     |
| Source                                   | Measure | F      | Sig.  | Partial Eta Squared | Source                                              | Measure | F      | Sig.  | Partial Eta Squared |
| ipsiCont                                 | f1      | 0.900  | 0.355 | 0.045               | ipsiCont                                            | f1      | 1.277  | 0.273 | 0.063               |
|                                          | f2      | 1.870  | 0.187 | 0.090               |                                                     | f2      | 2.311  | 0.145 | 0.108               |
|                                          | f3      | 3.594  | 0.073 | 0.159               |                                                     | f3      | 4.020  | 0.059 | 0.175               |
|                                          | f4      | 7.114  | 0.015 | 0.272               |                                                     | f4      | 7.664  | 0.012 | 0.287               |
|                                          | f5      | 8.231  | 0.010 | 0.302               |                                                     | f5      | 8.488  | 0.009 | 0.309               |
|                                          | f6      | 6.789  | 0.017 | 0.263               |                                                     | f6      | 7.065  | 0.016 | 0.271               |
|                                          | f7      | 4.333  | 0.051 | 0.186               |                                                     | f7      | 4.293  | 0.052 | 0.184               |
|                                          | f8      | 5.408  | 0.031 | 0.222               |                                                     | f8      | 5.851  | 0.026 | 0.235               |
| ipsiCont * ageGroup                      | f1      | 0.001  | 0.971 | 0.000               | ipsiCont * ageGroup                                 | f1      | 0.015  | 0.904 | 0.001               |
|                                          | f2      | 0.228  | 0.639 | 0.012               |                                                     | f2      | 0.434  | 0.518 | 0.022               |
|                                          | f3      | 0.043  | 0.837 | 0.002               |                                                     | f3      | 0.146  | 0.707 | 0.008               |
|                                          | f4      | 0.000  | 0.983 | 0.000               |                                                     | f4      | 0.011  | 0.917 | 0.001               |
|                                          | f5      | 0.102  | 0.752 | 0.005               |                                                     | f5      | 0.095  | 0.762 | 0.005               |
|                                          | f6      | 0.707  | 0.411 | 0.036               |                                                     | f6      | 0.719  | 0.407 | 0.036               |
|                                          | f7      | 1.751  | 0.201 | 0.084               |                                                     | f7      | 1.778  | 0.198 | 0.086               |
|                                          | f8      | 0.182  | 0.674 | 0.010               |                                                     | f8      | 0.120  | 0.733 | 0.006               |
| anteriority                              | f1      | 3.259  | 0.087 | 0.146               | anteriority                                         | f1      | 2.831  | 0.109 | 0.130               |
|                                          | f2      | 3.080  | 0.095 | 0.139               |                                                     | f2      | 2.694  | 0.117 | 0.124               |
|                                          | f3      | 3.828  | 0.065 | 0.168               |                                                     | f3      | 3.526  | 0.076 | 0.157               |
|                                          | f4      | 4.262  | 0.053 | 0.183               |                                                     | f4      | 4.287  | 0.052 | 0.184               |
|                                          | f5      | 3.190  | 0.090 | 0.144               |                                                     | f5      | 2.992  | 0.100 | 0.136               |
|                                          | f6      | 1.795  | 0.196 | 0.086               |                                                     | f6      | 1.592  | 0.222 | 0.077               |
|                                          | f7      | 1.872  | 0.187 | 0.090               |                                                     | f7      | 1.869  | 0.188 | 0.090               |
|                                          | f8      | 19.224 | 0.000 | 0.503               |                                                     | f8      | 19.582 | 0.000 | 0.508               |
| anteriority * ageGroup                   | f1      | 0.112  | 0.742 | 0.006               | anteriority * ageGroup                              | f1      | 0.214  | 0.649 | 0.011               |
|                                          | f2      | 0.005  | 0.944 | 0.000               |                                                     | f2      | 0.052  | 0.822 | 0.003               |
|                                          | f3      | 0.012  | 0.916 | 0.001               |                                                     | f3      | 0.038  | 0.847 | 0.002               |
|                                          | f4      | 0.051  | 0.824 | 0.003               |                                                     | f4      | 0.054  | 0.819 | 0.003               |
|                                          | f5      | 0.001  | 0.970 | 0.000               |                                                     | f5      | 0.001  | 0.980 | 0.000               |
|                                          | f6      | 0.032  | 0.860 | 0.002               |                                                     | f6      | 0.010  | 0.921 | 0.001               |
|                                          | f7      | 0.002  | 0.967 | 0.000               |                                                     | f7      | 0.001  | 0.974 | 0.000               |
|                                          | f8      | 0.765  | 0.393 | 0.039               |                                                     | f8      | 0.807  | 0.380 | 0.041               |
| ipsiCont * anteriority                   | f1      | 0.039  | 0.846 | 0.002               | ipsiCont * anteriority                              | f1      | 0.005  | 0.946 | 0.000               |
|                                          | f2      | 0.070  | 0.794 | 0.004               |                                                     | f2      | 0.000  | 0.997 | 0.000               |
|                                          | f3      | 0.508  | 0.485 | 0.026               |                                                     | f3      | 1.018  | 0.326 | 0.051               |
|                                          | f4      | 3.528  | 0.076 | 0.157               |                                                     | f4      | 3.781  | 0.067 | 0.166               |
|                                          | f5      | 4.482  | 0.048 | 0.191               |                                                     | f5      | 4.865  | 0.040 | 0.204               |
|                                          | f6      | 3.661  | 0.071 | 0.162               |                                                     | f6      | 4.322  | 0.051 | 0.185               |
|                                          | f7      | 1.812  | 0.194 | 0.087               |                                                     | f7      | 1.993  | 0.174 | 0.095               |
|                                          | f8      | 0.213  | 0.649 | 0.011               |                                                     | f8      | 0.220  | 0.644 | 0.011               |
| ipsiCont * anteriority * ageGroup        | f1      | 1.304  | 0.268 | 0.064               | ipsiCont * anteriority * ageGroup                   | f1      | 1.504  | 0.235 | 0.073               |
|                                          | f2      | 0.192  | 0.666 | 0.010               |                                                     | f2      | 0.100  | 0.755 | 0.005               |
|                                          | f3      | 0.001  | 0.974 | 0.000               |                                                     | f3      | 0.107  | 0.748 | 0.006               |
|                                          | f4      | 0.001  | 0.981 | 0.000               |                                                     | f4      | 0.048  | 0.829 | 0.003               |
|                                          | f5      | 0.037  | 0.850 | 0.002               |                                                     | f5      | 0.112  | 0.742 | 0.006               |
|                                          | f6      | 0.075  | 0.788 | 0.004               |                                                     | f6      | 0.196  | 0.663 | 0.010               |
|                                          | f7      | 0.173  | 0.682 | 0.009               |                                                     | f7      | 0.175  | 0.680 | 0.009               |
|                                          | f8      | 0.286  | 0.599 | 0.015               |                                                     | f8      | 0.282  | 0.602 | 0.015               |

Table 3: Experiment 2 - table supplement 3: Results of the repeated measures ANOVA with three within-subjects factors for the frequency decomposed AAM. f1 to f8 refer to the subbands in descending order of frequency. ipsiCont: ipsilateral vs. contralateral channel (with respect to the attended side). ageGroup: older vs. younger adults. anteriority: stimulus presentation from the front or back speakers. The left columns show the results when only the corresponding channel was used to reject artifacts, while the right columns display the results when artifact rejection additionally considers the M.SCM and HEOG.

| Subbands TAM                             |         |        |       |                     |                                                     |         |        |       |                     |
|------------------------------------------|---------|--------|-------|---------------------|-----------------------------------------------------|---------|--------|-------|---------------------|
| Artifact rejection based on channel only |         |        |       |                     | Artifact rejection based on channel, M.SCM and HEOG |         |        |       |                     |
| Source                                   | Measure | F      | Sig.  | Partial Eta Squared | Source                                              | Measure | F      | Sig.  | Partial Eta Squared |
| ipsiCont                                 | f1      | 0.006  | 0.937 | 0.000               | ipsiCont                                            | f1      | 0.012  | 0.915 | 0.001               |
|                                          | f2      | 0.005  | 0.946 | 0.000               |                                                     | f2      | 0.009  | 0.927 | 0.000               |
|                                          | f3      | 0.064  | 0.803 | 0.003               |                                                     | f3      | 0.054  | 0.818 | 0.003               |
|                                          | f4      | 0.308  | 0.585 | 0.016               |                                                     | f4      | 0.277  | 0.605 | 0.014               |
|                                          | f5      | 0.461  | 0.505 | 0.024               |                                                     | f5      | 0.466  | 0.503 | 0.024               |
|                                          | f6      | 0.558  | 0.464 | 0.029               |                                                     | f6      | 0.571  | 0.459 | 0.029               |
|                                          | f7      | 0.381  | 0.544 | 0.020               |                                                     | f7      | 0.390  | 0.540 | 0.020               |
|                                          | f8      | 1.558  | 0.227 | 0.076               |                                                     | f8      | 1.434  | 0.246 | 0.070               |
| ipsiCont * ageGroup                      | f1      | 0.220  | 0.645 | 0.011               | ipsiCont * ageGroup                                 | f1      | 0.270  | 0.609 | 0.014               |
|                                          | f2      | 0.087  | 0.771 | 0.005               |                                                     | f2      | 0.093  | 0.763 | 0.005               |
|                                          | f3      | 0.004  | 0.948 | 0.000               |                                                     | f3      | 0.008  | 0.930 | 0.000               |
|                                          | f4      | 0.001  | 0.971 | 0.000               |                                                     | f4      | 0.004  | 0.949 | 0.000               |
|                                          | f5      | 0.041  | 0.842 | 0.002               |                                                     | f5      | 0.043  | 0.838 | 0.002               |
|                                          | f6      | 0.133  | 0.719 | 0.007               |                                                     | f6      | 0.146  | 0.707 | 0.008               |
|                                          | f7      | 0.070  | 0.794 | 0.004               |                                                     | f7      | 0.077  | 0.784 | 0.004               |
|                                          | f8      | 0.036  | 0.851 | 0.002               |                                                     | f8      | 0.091  | 0.767 | 0.005               |
| anteriority                              | f1      | 6.104  | 0.023 | 0.243               | anteriority                                         | f1      | 6.063  | 0.024 | 0.242               |
|                                          | f2      | 5.953  | 0.025 | 0.239               |                                                     | f2      | 5.635  | 0.028 | 0.229               |
|                                          | f3      | 7.169  | 0.015 | 0.274               |                                                     | f3      | 6.688  | 0.018 | 0.260               |
|                                          | f4      | 8.129  | 0.010 | 0.300               |                                                     | f4      | 7.834  | 0.011 | 0.292               |
|                                          | f5      | 8.176  | 0.010 | 0.301               |                                                     | f5      | 7.666  | 0.012 | 0.287               |
|                                          | f6      | 7.942  | 0.011 | 0.295               |                                                     | f6      | 7.638  | 0.012 | 0.287               |
|                                          | f7      | 7.330  | 0.014 | 0.278               |                                                     | f7      | 7.287  | 0.014 | 0.277               |
|                                          | f8      | 42.497 | 0.000 | 0.691               |                                                     | f8      | 42.834 | 0.000 | 0.693               |
| anteriority * ageGroup                   | f1      | 0.377  | 0.546 | 0.019               | anteriority * ageGroup                              | f1      | 0.391  | 0.539 | 0.020               |
|                                          | f2      | 1.138  | 0.299 | 0.057               |                                                     | f2      | 1.012  | 0.327 | 0.051               |
|                                          | f3      | 1.682  | 0.210 | 0.081               |                                                     | f3      | 1.402  | 0.251 | 0.069               |
|                                          | f4      | 1.517  | 0.233 | 0.074               |                                                     | f4      | 1.343  | 0.261 | 0.066               |
|                                          | f5      | 0.793  | 0.384 | 0.040               |                                                     | f5      | 0.637  | 0.435 | 0.032               |
|                                          | f6      | 0.446  | 0.512 | 0.023               |                                                     | f6      | 0.355  | 0.558 | 0.018               |
|                                          | f7      | 0.516  | 0.481 | 0.026               |                                                     | f7      | 0.509  | 0.484 | 0.026               |
|                                          | f8      | 1.709  | 0.207 | 0.083               |                                                     | f8      | 1.688  | 0.209 | 0.082               |
| ipsiCont * anteriority                   | f1      | 0.170  | 0.685 | 0.009               | ipsiCont * anteriority                              | f1      | 0.206  | 0.655 | 0.011               |
|                                          | f2      | 0.380  | 0.545 | 0.020               |                                                     | f2      | 0.450  | 0.510 | 0.023               |
|                                          | f3      | 0.918  | 0.350 | 0.046               |                                                     | f3      | 1.079  | 0.312 | 0.054               |
|                                          | f4      | 0.533  | 0.474 | 0.027               |                                                     | f4      | 0.598  | 0.449 | 0.031               |
|                                          | f5      | 0.175  | 0.681 | 0.009               |                                                     | f5      | 0.249  | 0.624 | 0.013               |
|                                          | f6      | 0.075  | 0.787 | 0.004               |                                                     | f6      | 0.109  | 0.745 | 0.006               |
|                                          | f7      | 0.658  | 0.427 | 0.033               |                                                     | f7      | 0.735  | 0.402 | 0.037               |
|                                          | f8      | 0.581  | 0.455 | 0.030               |                                                     | f8      | 0.608  | 0.445 | 0.031               |
| ipsiCont * anteriority * ageGroup        | f1      | 0.519  | 0.480 | 0.027               | ipsiCont * anteriority * ageGroup                   | f1      | 0.482  | 0.496 | 0.025               |
|                                          | f2      | 0.571  | 0.459 | 0.029               |                                                     | f2      | 0.529  | 0.476 | 0.027               |
|                                          | f3      | 0.428  | 0.521 | 0.022               |                                                     | f3      | 0.341  | 0.566 | 0.018               |
|                                          | f4      | 0.038  | 0.848 | 0.002               |                                                     | f4      | 0.020  | 0.888 | 0.001               |
|                                          | f5      | 0.022  | 0.884 | 0.001               |                                                     | f5      | 0.061  | 0.808 | 0.003               |
|                                          | f6      | 0.011  | 0.916 | 0.001               |                                                     | f6      | 0.038  | 0.848 | 0.002               |
|                                          | f7      | 0.103  | 0.751 | 0.005               |                                                     | f7      | 0.130  | 0.723 | 0.007               |
|                                          | f8      | 0.186  | 0.671 | 0.010               |                                                     | f8      | 0.172  | 0.683 | 0.009               |

Table 4: Experiment 2 - table supplement 4: Results of the repeated measures ANOVA with three within-subjects factors for the frequency decomposed TAM. f1 to f8 refer to the subbands in descending order of frequency. ipsiCont: ipsilateral vs. contralateral channel (with respect to the attended side). ageGroup: older vs. younger adults. anteriority: stimulus presentation from the front or back speakers. The left columns show the results when only the corresponding channel was used to reject artifacts, while the right columns display the results when artifact rejection additionally considers the M.SCM and HEOG.

| Subbands SAM                             |         |        |       |                     |                                                     |         |        |       |                     |
|------------------------------------------|---------|--------|-------|---------------------|-----------------------------------------------------|---------|--------|-------|---------------------|
| Artifact rejection based on channel only |         |        |       |                     | Artifact rejection based on channel, M.SCM and HEOG |         |        |       |                     |
| Source                                   | Measure | F      | Sig.  | Partial Eta Squared | Source                                              | Measure | F      | Sig.  | Partial Eta Squared |
| ipsiCont                                 | f1      | 10.582 | 0.004 | 0.358               | ipsiCont                                            | f1      | 11.524 | 0.003 | 0.378               |
|                                          | f2      | 15.800 | 0.001 | 0.454               |                                                     | f2      | 17.718 | 0.000 | 0.483               |
|                                          | f3      | 16.313 | 0.001 | 0.462               |                                                     | f3      | 16.499 | 0.001 | 0.465               |
|                                          | f4      | 19.565 | 0.000 | 0.507               |                                                     | f4      | 20.312 | 0.000 | 0.517               |
|                                          | f5      | 24.001 | 0.000 | 0.558               |                                                     | f5      | 24.642 | 0.000 | 0.565               |
|                                          | f6      | 23.512 | 0.000 | 0.553               |                                                     | f6      | 23.446 | 0.000 | 0.552               |
|                                          | f7      | 32.793 | 0.000 | 0.633               |                                                     | f7      | 33.528 | 0.000 | 0.638               |
|                                          | f8      | 10.776 | 0.004 | 0.362               |                                                     | f8      | 11.013 | 0.004 | 0.367               |
| ipsiCont * ageGroup                      | f1      | 0.005  | 0.944 | 0.000               | ipsiCont * ageGroup                                 | f1      | 0.092  | 0.765 | 0.005               |
|                                          | f2      | 0.681  | 0.420 | 0.035               |                                                     | f2      | 1.407  | 0.250 | 0.069               |
|                                          | f3      | 1.045  | 0.320 | 0.052               |                                                     | f3      | 1.483  | 0.238 | 0.072               |
|                                          | f4      | 0.999  | 0.330 | 0.050               |                                                     | f4      | 1.363  | 0.257 | 0.067               |
|                                          | f5      | 1.279  | 0.272 | 0.063               |                                                     | f5      | 1.556  | 0.227 | 0.076               |
|                                          | f6      | 1.201  | 0.287 | 0.059               |                                                     | f6      | 1.307  | 0.267 | 0.064               |
|                                          | f7      | 0.887  | 0.358 | 0.045               |                                                     | f7      | 0.972  | 0.337 | 0.049               |
|                                          | f8      | 0.189  | 0.668 | 0.010               |                                                     | f8      | 0.209  | 0.653 | 0.011               |
| anteriority                              | f1      | 5.928  | 0.025 | 0.238               | anteriority                                         | f1      | 4.908  | 0.039 | 0.205               |
|                                          | f2      | 7.385  | 0.014 | 0.280               |                                                     | f2      | 6.710  | 0.018 | 0.261               |
|                                          | f3      | 10.718 | 0.004 | 0.361               |                                                     | f3      | 10.282 | 0.005 | 0.351               |
|                                          | f4      | 12.880 | 0.002 | 0.404               |                                                     | f4      | 12.693 | 0.002 | 0.400               |
|                                          | f5      | 12.391 | 0.002 | 0.395               |                                                     | f5      | 12.424 | 0.002 | 0.395               |
|                                          | f6      | 12.730 | 0.002 | 0.401               |                                                     | f6      | 12.864 | 0.002 | 0.404               |
|                                          | f7      | 12.338 | 0.002 | 0.394               |                                                     | f7      | 12.590 | 0.002 | 0.399               |
|                                          | f8      | 71.990 | 0.000 | 0.791               |                                                     | f8      | 74.329 | 0.000 | 0.796               |
| anteriority * ageGroup                   | f1      | 0.049  | 0.828 | 0.003               | anteriority * ageGroup                              | f1      | 0.321  | 0.577 | 0.017               |
|                                          | f2      | 0.041  | 0.842 | 0.002               |                                                     | f2      | 0.008  | 0.929 | 0.000               |
|                                          | f3      | 0.001  | 0.980 | 0.000               |                                                     | f3      | 0.001  | 0.974 | 0.000               |
|                                          | f4      | 0.100  | 0.756 | 0.005               |                                                     | f4      | 0.078  | 0.783 | 0.004               |
|                                          | f5      | 0.153  | 0.700 | 0.008               |                                                     | f5      | 0.116  | 0.737 | 0.006               |
|                                          | f6      | 0.088  | 0.770 | 0.005               |                                                     | f6      | 0.059  | 0.811 | 0.003               |
|                                          | f7      | 0.069  | 0.796 | 0.004               |                                                     | f7      | 0.089  | 0.769 | 0.005               |
|                                          | f8      | 0.709  | 0.410 | 0.036               |                                                     | f8      | 0.744  | 0.399 | 0.038               |
| ipsiCont * anteriority                   | f1      | 1.320  | 0.265 | 0.065               | ipsiCont * anteriority                              | f1      | 0.601  | 0.448 | 0.031               |
|                                          | f2      | 0.013  | 0.910 | 0.001               |                                                     | f2      | 0.213  | 0.650 | 0.011               |
|                                          | f3      | 0.165  | 0.689 | 0.009               |                                                     | f3      | 0.302  | 0.589 | 0.016               |
|                                          | f4      | 0.426  | 0.522 | 0.022               |                                                     | f4      | 0.504  | 0.486 | 0.026               |
|                                          | f5      | 0.158  | 0.695 | 0.008               |                                                     | f5      | 0.189  | 0.669 | 0.010               |
|                                          | f6      | 0.039  | 0.845 | 0.002               |                                                     | f6      | 0.047  | 0.831 | 0.002               |
|                                          | f7      | 0.009  | 0.926 | 0.000               |                                                     | f7      | 0.004  | 0.949 | 0.000               |
|                                          | f8      | 0.412  | 0.529 | 0.021               |                                                     | f8      | 0.371  | 0.550 | 0.019               |
| ipsiCont * anteriority * ageGroup        | f1      | 1.466  | 0.241 | 0.072               | ipsiCont * anteriority * ageGroup                   | f1      | 1.187  | 0.290 | 0.059               |
|                                          | f2      | 0.713  | 0.409 | 0.036               |                                                     | f2      | 0.262  | 0.614 | 0.014               |
|                                          | f3      | 0.012  | 0.915 | 0.001               |                                                     | f3      | 0.010  | 0.923 | 0.001               |
|                                          | f4      | 0.271  | 0.609 | 0.014               |                                                     | f4      | 0.379  | 0.545 | 0.020               |
|                                          | f5      | 0.851  | 0.368 | 0.043               |                                                     | f5      | 0.959  | 0.340 | 0.048               |
|                                          | f6      | 1.455  | 0.243 | 0.071               |                                                     | f6      | 1.536  | 0.230 | 0.075               |
|                                          | f7      | 0.880  | 0.360 | 0.044               |                                                     | f7      | 0.906  | 0.353 | 0.046               |
|                                          | f8      | 0.393  | 0.538 | 0.020               |                                                     | f8      | 0.466  | 0.503 | 0.024               |

Table 5: Experiment 2 - table supplement 5: Results of the repeated measures ANOVA with three within-subjects factors for the frequency decomposed SAM. f1 to f8 refer to the subbands in descending order of frequency. ipsiCont: ipsilateral vs. contralateral channel (with respect to the attended side). ageGroup: older vs. younger adults. anteriority: stimulus presentation from the front or back speakers. The left columns show the results when only the corresponding channel was used to reject artifacts, while the right columns display the results when artifact rejection additionally considers the M.SCM and HEOG.
